Title:

Development and external validation of a practical diagnostic support tool, ‘ABC 2  
-Screener’, to predict sarcopenia among patients on maintenance haemodialysis: A  
multicentre cross-sectional study

Authors:

Masatoshi Matsunami, Tetsuro Aita, Tsukasa Kamitani, Yu Munakata, Atsuro Kawaji,  
Hiroshi Kuji, Tomo Suzuki, and Noriaki Kurita

The authors have withdrawn their manuscript owing to uncorrectable data errors which  
were discovered after posting. Therefore, the authors do not wish this work to be cited  
as reference for the project. If you have any questions, please contact the corresponding  
author.
